# Supplementary material
Source: Springer Nature journal article supplement (https://www.springermedizin.de/resource/supplementary/12955_2008_563_MOESM4_ESM.pdf/9560716)

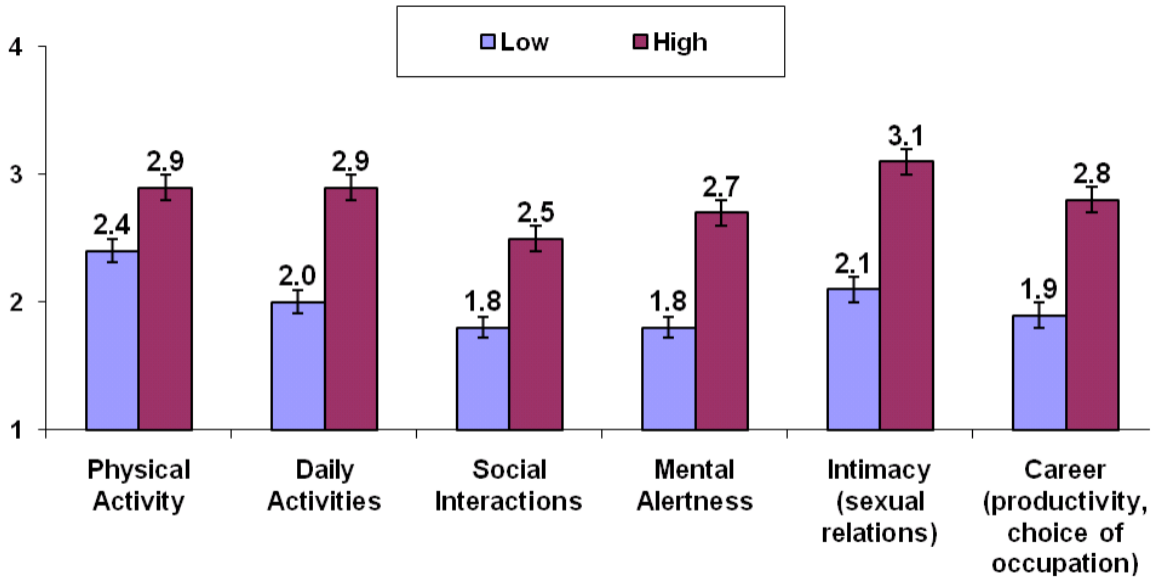

*Note: Mean score and Standard Errors for ratings of impact on various aspects of life*

Supplement: MOESM4 [file 9560716]
